# Supplementary material for: The acyl nitroso Diels–Alder (ANDA) reaction of sorbate derivatives: an X-ray and 15N NMR study with an application to amino-acid synthesis
Source: Royal Society of Chemistry journal article supplement (doi:10.1039/b912963d), 2009-01-01

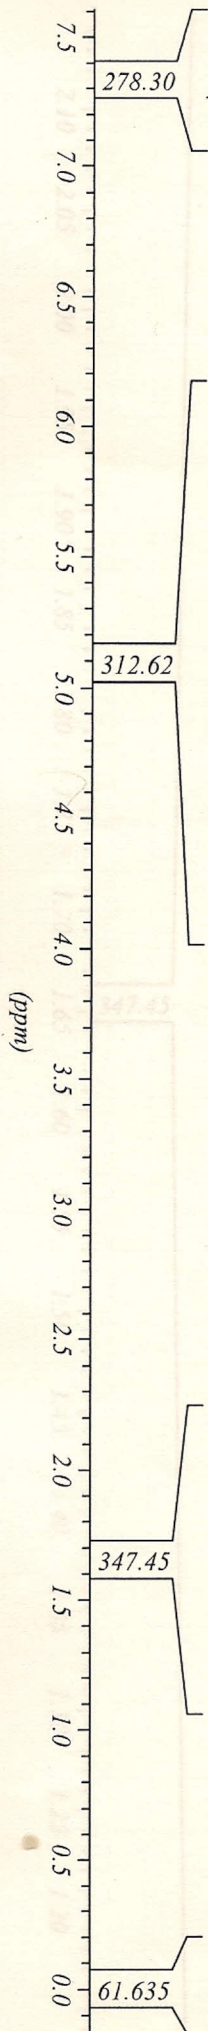

aromatic

CH<sub>2</sub>CH<sub>3</sub>

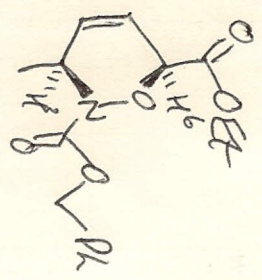

double bond

OCH<sub>2</sub>R

OCH<sub>2</sub>CH<sub>3</sub>

ethyl acetate?

CH<sub>3</sub>

CH<sub>3</sub>-C=O

Experiment Data Parameters

|        |           |
|--------|-----------|
| NAME   | : 1471.30 |
| EXPNO  | : 1469.66 |
| PROCNO | : 1463.57 |
| LBB    | : 1105.55 |
| RRU    | : 1193.07 |
| 1      | : 1181.29 |
| 2      | : 1189.22 |
|        | : 1185.37 |
|        | : 1184.27 |
|        | : 1182.90 |
|        | : 1174.10 |

|         |
|---------|
| 1060.42 |
| 1048.05 |
| 1041.17 |
| 1028.66 |
| 942.47  |
| 865.35  |
| 858.20  |
| 851.06  |
| 843.91  |

|        |
|--------|
| 409.79 |
| 318.37 |
| 280.29 |
| 273.56 |
| 270.40 |
| 263.25 |
| 256.10 |

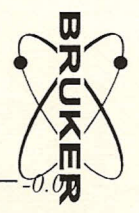

TMS

lab number AVS  
 L.Bollans  
 BBDAZF2  
 proton.liv CDC13 {D:\Bruker\TOPSPIN} san 12

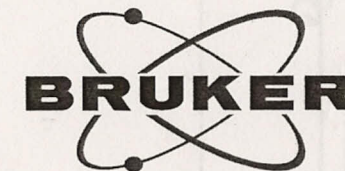

2946.01  
 2941.53  
 2936.75  
 2934.52  
 2933.01  
 2931.23  
 2928.39  
 2926.10  
 2923.76  
 2910.27  
 2367.25  
 2341.95  
 2331.23  
 2095.89  
 2083.07  
 2080.12  
 2067.59  
 2023.09  
 1872.08  
 1836.05  
 1658.71  
 1651.48  
 1644.36  
 1637.28  
 1530.20  
 1517.92  
 1475.72  
 1469.66  
 1462.76  
 1457.37  
 1392.98  
 1389.15  
 1385.32  
 1381.49  
 1320.17  
 1313.28  
 817.21  
 562.65  
 513.84  
 510.04  
 502.90  
 495.75  
 29.17  
 -0.00

Current Data Parameters  
 NAME Apr21-2008  
 EXPNO 120  
 PROCNO 1

F2 - Acquisition Parameters  
 Date\_ 20080421  
 Time\_ 12.34  
 INSTRUM spect  
 PROBHD 5 mm QNP 1H/13  
 PULPROG zg  
 TD 32768  
 SOLVENT CDC13  
 NS 64  
 DS 2  
 SWH 6218.905 Hz  
 FIDRES 0.189786 Hz  
 AQ 2.6345973 sec  
 RG 1  
 DW 80.400 usec  
 DE 6.00 usec  
 TE 296.0 K  
 D1 2.00000000 sec  
 TDO 1

===== CHANNEL f1 =====  
 NUC1 1H  
 P1 13.25 usec  
 PL1 3.00 dB  
 SFO1 400.1325018 MHz

F2 - Processing parameters  
 SI 65536  
 SF 400.1300038 MHz  
 WDW GM  
 SSB 0  
 LB -0.50 Hz  
 GB 0.3  
 PC 1.00

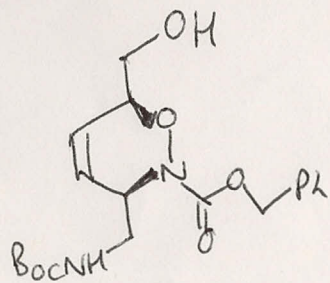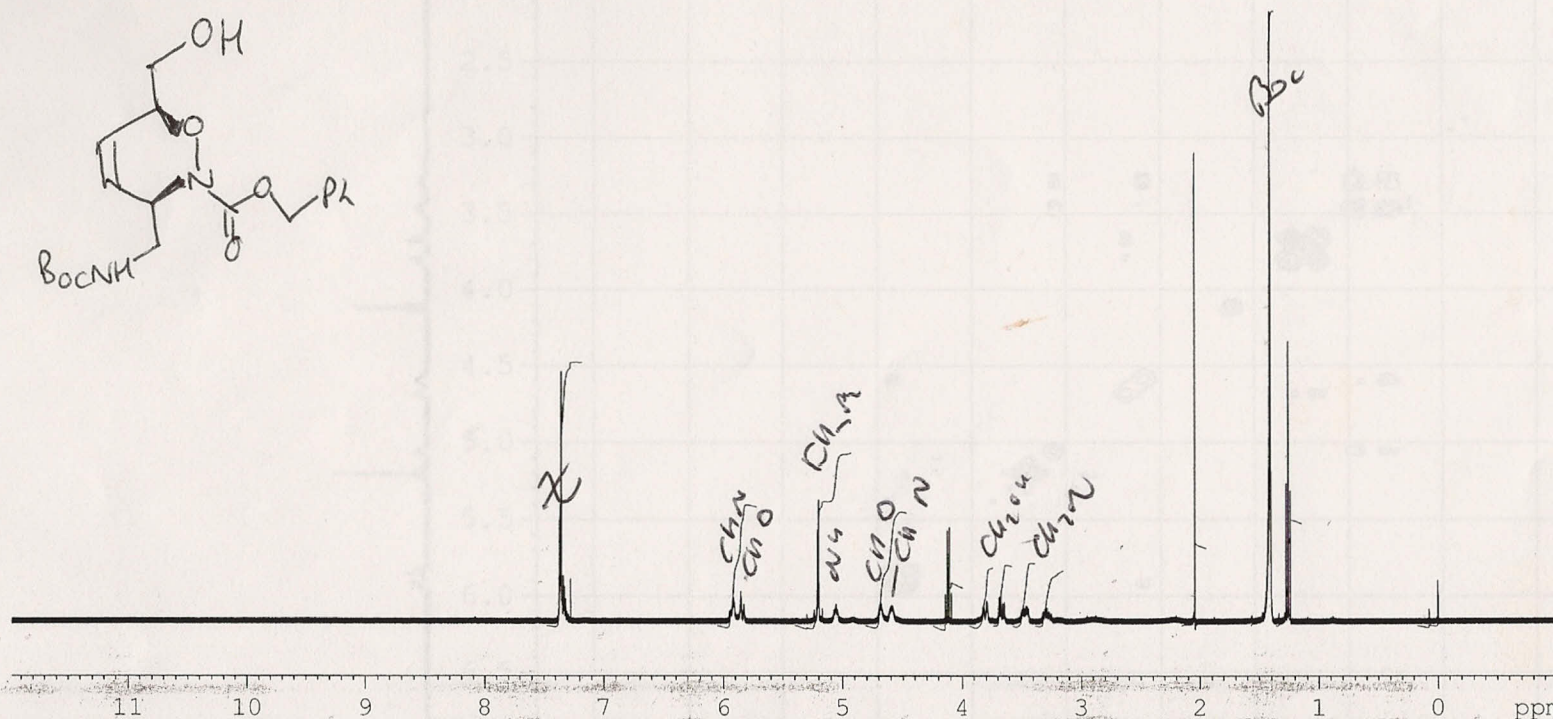

15.10  
 6.82  
 9.92  
 6.46  
 2.17  
 3.34  
 3.42  
 3.59  
 3.18  
 4.47  
 35.46  
 5.86  
 0.23

lab number AVS

L.Bollans

BBDAZF1

proton.liv CDCl3 {D:\Bruker\TOPSPIN} san 13

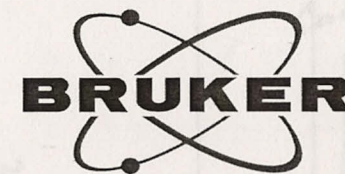

Current Data Parameters  
NAME Apr21-2008  
EXPNO 130  
PROCNO 1

F2 - Acquisition Parameters  
Date 20080421  
Time 12.48  
INSTRUM spect  
PROBHD 5 mm QNP 1H/13  
PULPROG zg  
TD 32768  
SOLVENT CDCl3  
NS 64  
DS 2  
SWH 6218.905 Hz  
FIDRES 0.189786 Hz  
AQ 2.6345973 sec  
RG 1  
DW 80.400 usec  
DE 6.00 usec  
TE 296.0 K  
D1 2.00000000 sec  
TD0 1

===== CHANNEL f1 =====  
NUC1 1H  
P1 13.25 usec  
PL1 3.00 dB  
SFO1 400.1325018 MHz

F2 - Processing parameters  
SI 65536  
SF 400.1300046 MHz  
WDW GM  
SSB 0  
LB -0.50 Hz  
GB 0.3  
PC 1.00

2948.69  
2947.37  
2944.26  
2937.31  
2933.84  
2909.51  
2356.31  
2344.97  
2099.80  
2087.22  
2082.00  
2069.73  
1834.18  
1658.86  
1651.86  
1644.79  
1637.48  
1506.14  
1498.73  
1495.68  
1300.70  
817.65  
579.64  
577.91  
569.16  
510.39  
503.29  
496.15  
0.00

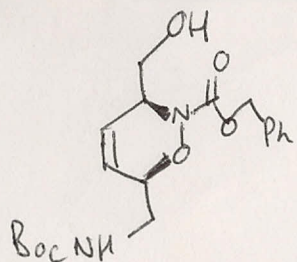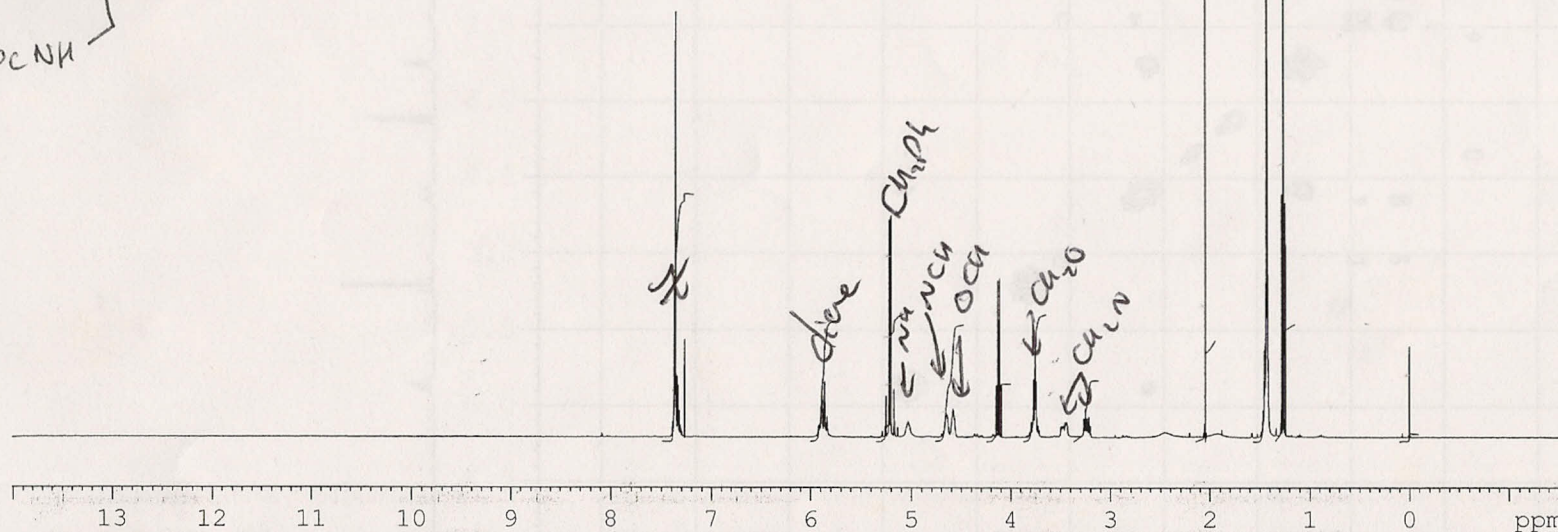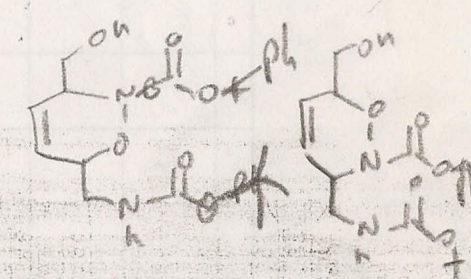

13 12 11 10 9 8 7 6 5 4 3 2 1 0 ppm

5.26  
14.47  
6.37  
7.05  
7.50  
6.83  
3.38  
7.44  
3.59  
5.96  
36.49  
6.86  
0.43

lab number AVS  
 L.Bollans  
 BnPSBoc1  
 proton.liv CDC13 {D:\Bruker\TOPSPIN} san 32

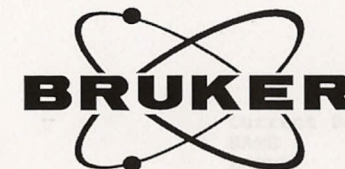

Current Data Parameters  
 NAME May09-2008  
 EXPNO 320  
 PROCNO 1

F2 - Acquisition Parameters  
 Date\_ 20080510  
 Time\_ 6.48  
 INSTRUM spect  
 PROBHD 5 mm QNP 1H/13  
 PULPROG zg  
 TD 32768  
 SOLVENT CDC13  
 NS 64  
 DS 2  
 SWH 6218.905 Hz  
 FIDRES 0.189786 Hz  
 AQ 2.6345973 sec  
 RG 1  
 DW 80.400 usec  
 DE 6.00 usec  
 TE 294.2 K  
 D1 2.00000000 sec  
 TD0 1

===== CHANNEL f1 =====  
 NUC1 1H  
 P1 13.25 usec  
 PL1 3.00 dB  
 SFO1 400.1325018 MHz

F2 - Processing parameters  
 SI 65536  
 SF 400.1299967 MHz  
 WDW GM  
 SSB 0  
 LB -0.50 Hz  
 GB 0.3  
 PC 1.00

2392.58  
 2389.97  
 2388.03  
 2385.47  
 2367.74  
 2366.20  
 2364.61  
 2355.98  
 2065.74  
 2064.10  
 1677.41  
 1674.87  
 1670.65  
 1668.20  
 1663.93  
 1661.50  
 695.81  
 688.85  
 681.58  
 674.57  
 611.49  
 600.52  
 550.96  
 544.21  
 391.22  
 383.80  
 376.35

6.76  
 6.67  
 6.70

6.96  
 7.17

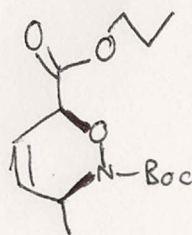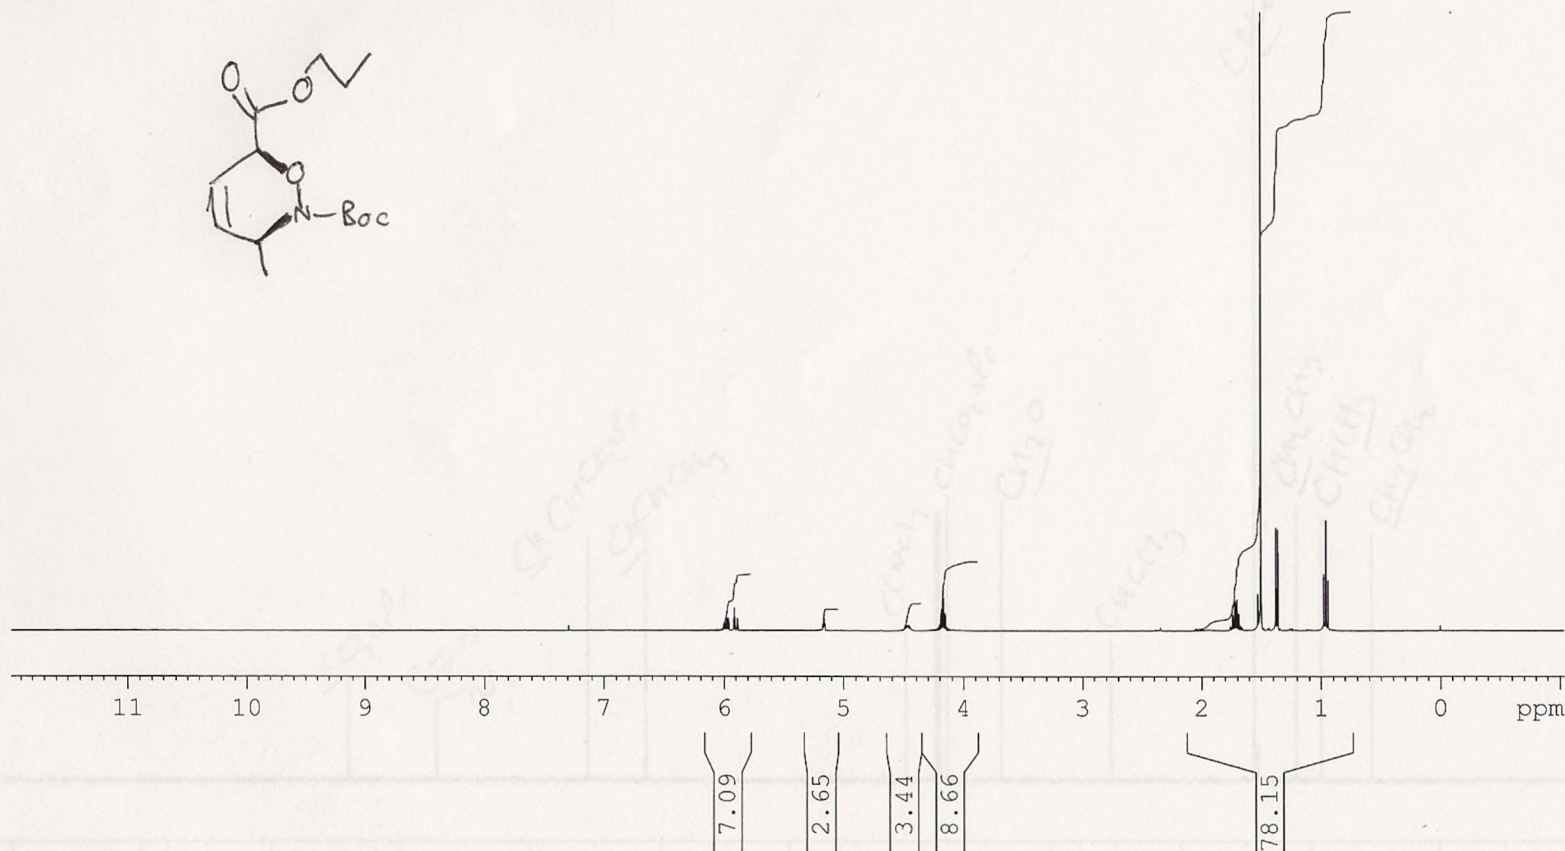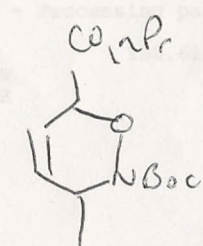

lab number AVS  
 L.Bollans  
 B5-morn  
 proton.liv D2O {D:\Bruker\TOPSPIN} san 20

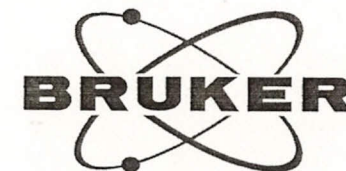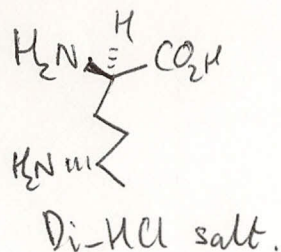

Current Data Parameters  
 NAME Feb11-2008  
 EXPNO 200  
 PROCNO 1

F2 - Acquisition Parameters  
 Date\_ 20080211  
 Time\_ 18.11  
 INSTRUM spect  
 PROBHD 5 mm QNP 1H/13  
 PULPROG zg  
 TD 32768  
 SOLVENT D2O  
 NS 64  
 DS 2  
 SWH 6218.905 Hz  
 FIDRES 0.189786 Hz  
 AQ 2.6345973 sec  
 RG 1  
 DW 80.400 usec  
 DE 6.00 usec  
 TE 295.6 K  
 D1 1.00000000 sec  
 TDO 1

==== CHANNEL f1 =====  
 NUC1 1H  
 P1 13.25 usec  
 PL1 3.00 dB  
 SFO1 400.1325018 MHz

F2 - Processing parameters  
 SI 65536  
 SF 400.1300000 MHz  
 WDW GM  
 SSB 0  
 LB -0.50 Hz  
 GB 0.3  
 PC 1.00

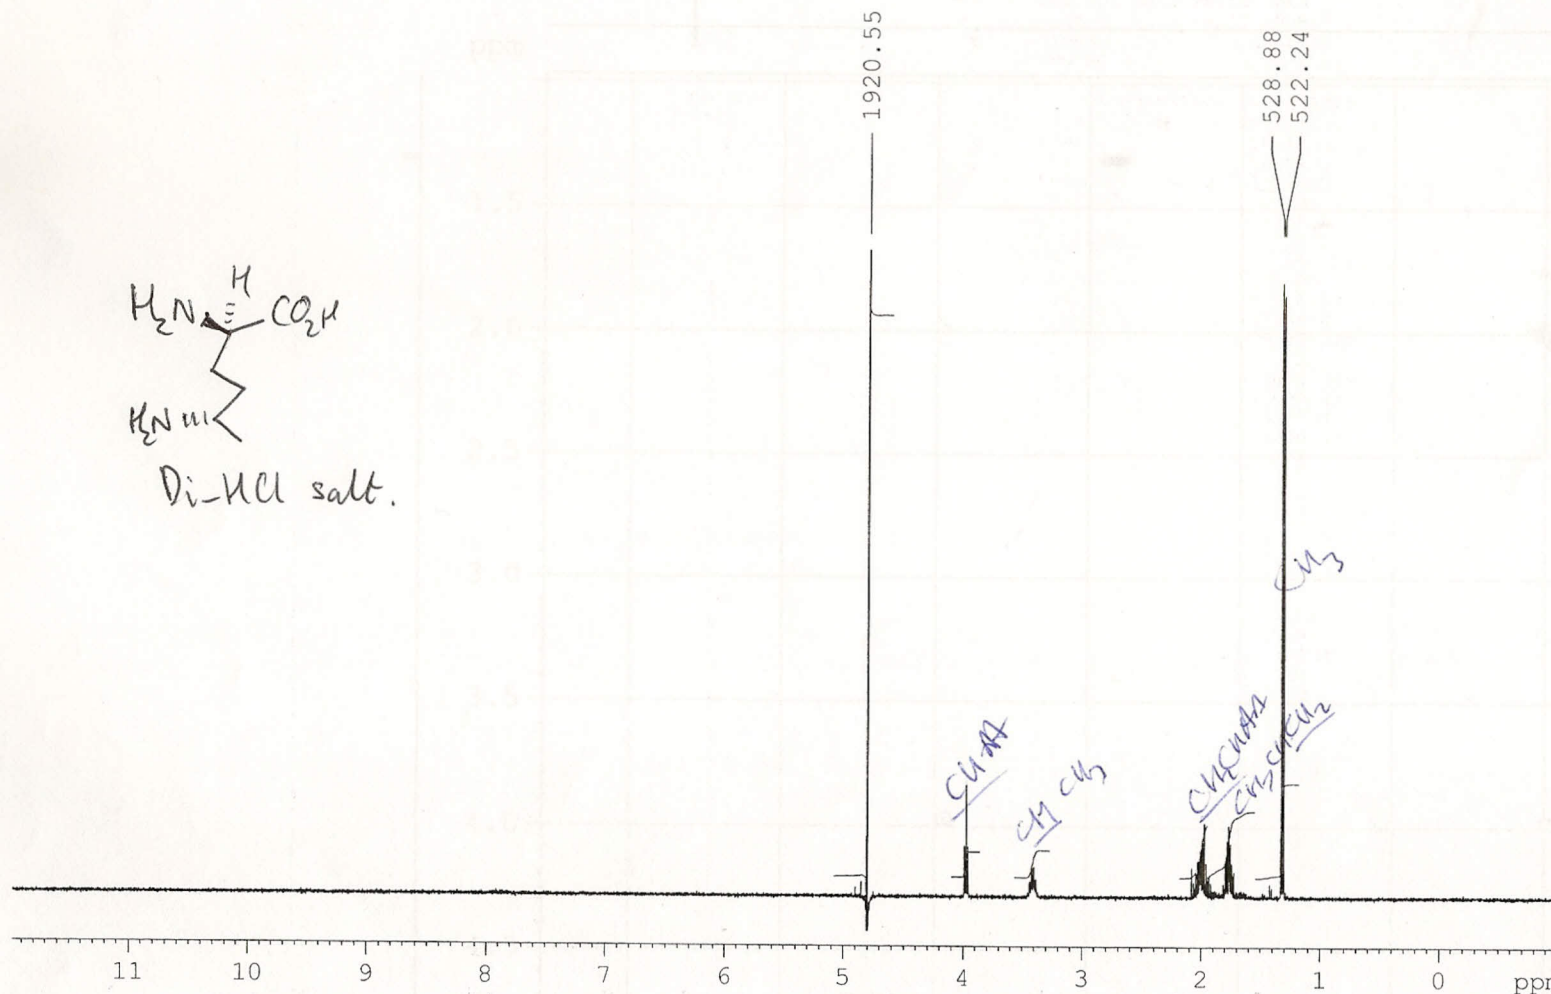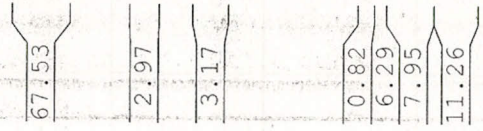

lab number AVS  
 L.Bollans  
 BMSBoc1  
 proton.liv CDCl3 {D:\Bruker\TOPSPIN} san 33

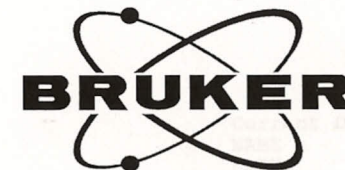

Current Data Parameters  
 NAME May09-2008  
 EXPNO 330  
 PROCNO 1

F2 - Acquisition Parameters  
 Date 20080511  
 Time 5.13  
 INSTRUM spect  
 PROBHD 5 mm QNP 1H/13  
 PULPROG zg  
 TD 32768  
 SOLVENT CDCl3  
 NS 64  
 DS 2  
 SWH 6218.905 Hz  
 FIDRES 0.189786 Hz  
 AQ 2.6345973 sec  
 RG 1  
 DW 80.400 usec  
 DE 6.00 usec  
 TE 296.1 K  
 D1 2.00000000 sec  
 TD0 1

===== CHANNEL f1 =====  
 NUC1 1H  
 P1 13.25 usec  
 PL1 3.00 dB  
 SFO1 400.1325018 MHz

F2 - Processing parameters  
 SI 65536  
 SF 400.1299965 MHz  
 WDW GM  
 SSB 0  
 LB -0.50 Hz  
 GB 0.3  
 PC 1.00

2392.28  
 2389.70  
 2387.81  
 2385.31  
 2373.42  
 2371.97  
 2370.44  
 2361.75  
 2072.62  
 2071.07  
 1526.37  
 600.81  
 548.73  
 541.99

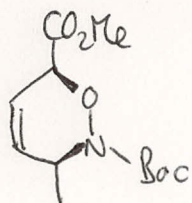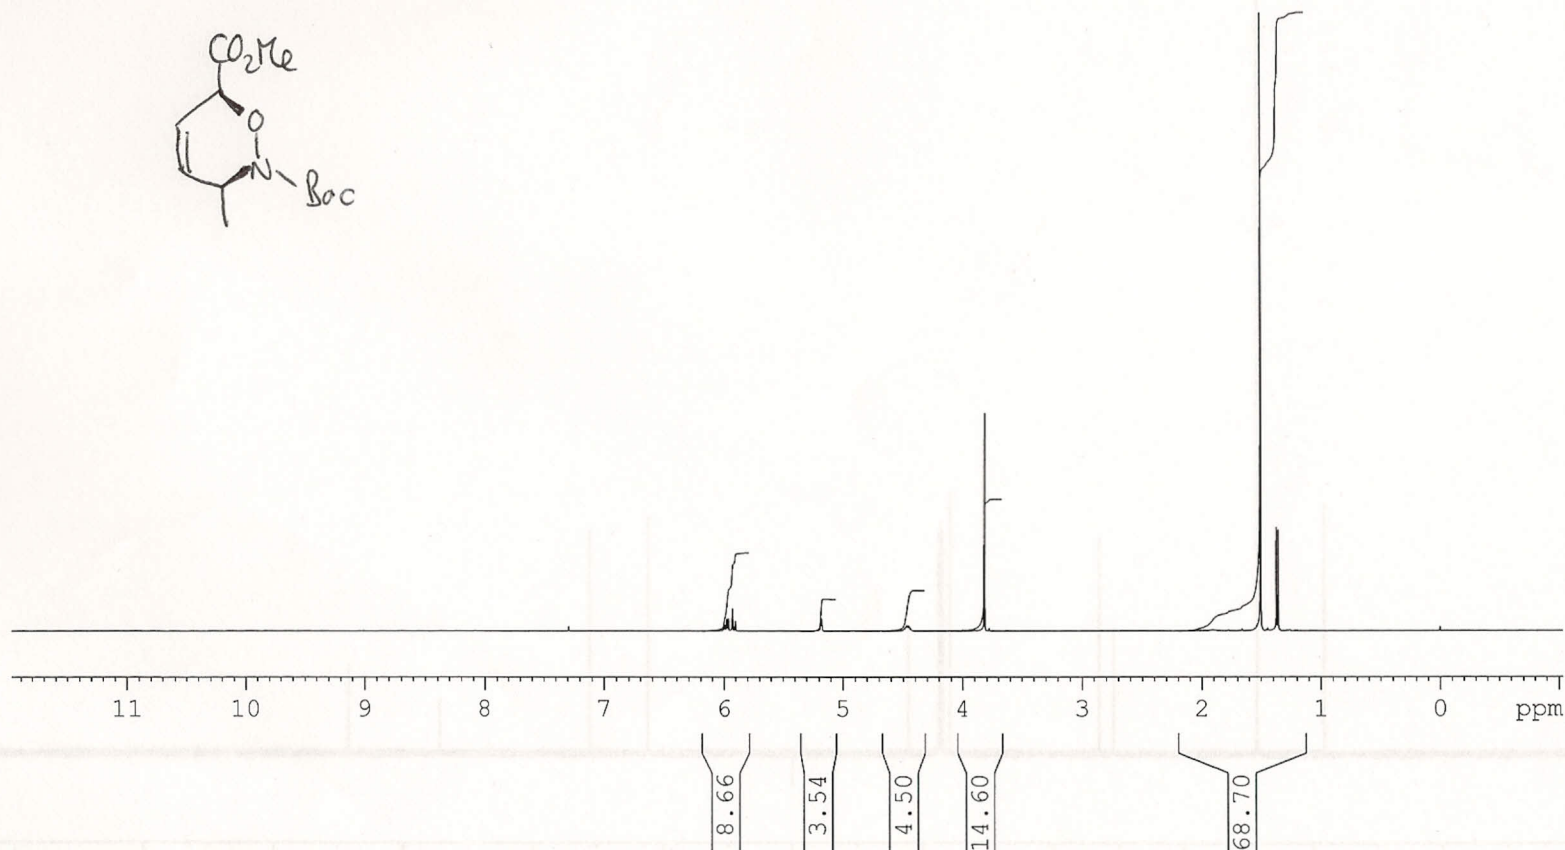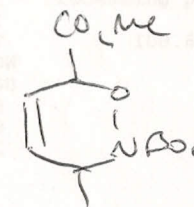

lab number AVS  
L.Bollans  
PS/ZADD

carbon.liv CDC13 {D:\Bruker\TOPSPIN} san 14

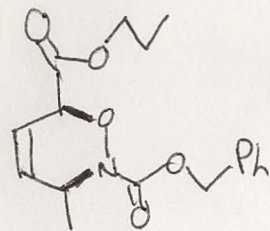

167.657  
155.191  
136.330  
130.952  
129.387  
128.940  
128.659  
128.481  
128.008  
127.370  
122.446  
77.778  
77.460  
77.142  
76.494  
68.114  
67.668  
50.886  
22.241  
18.368  
10.654

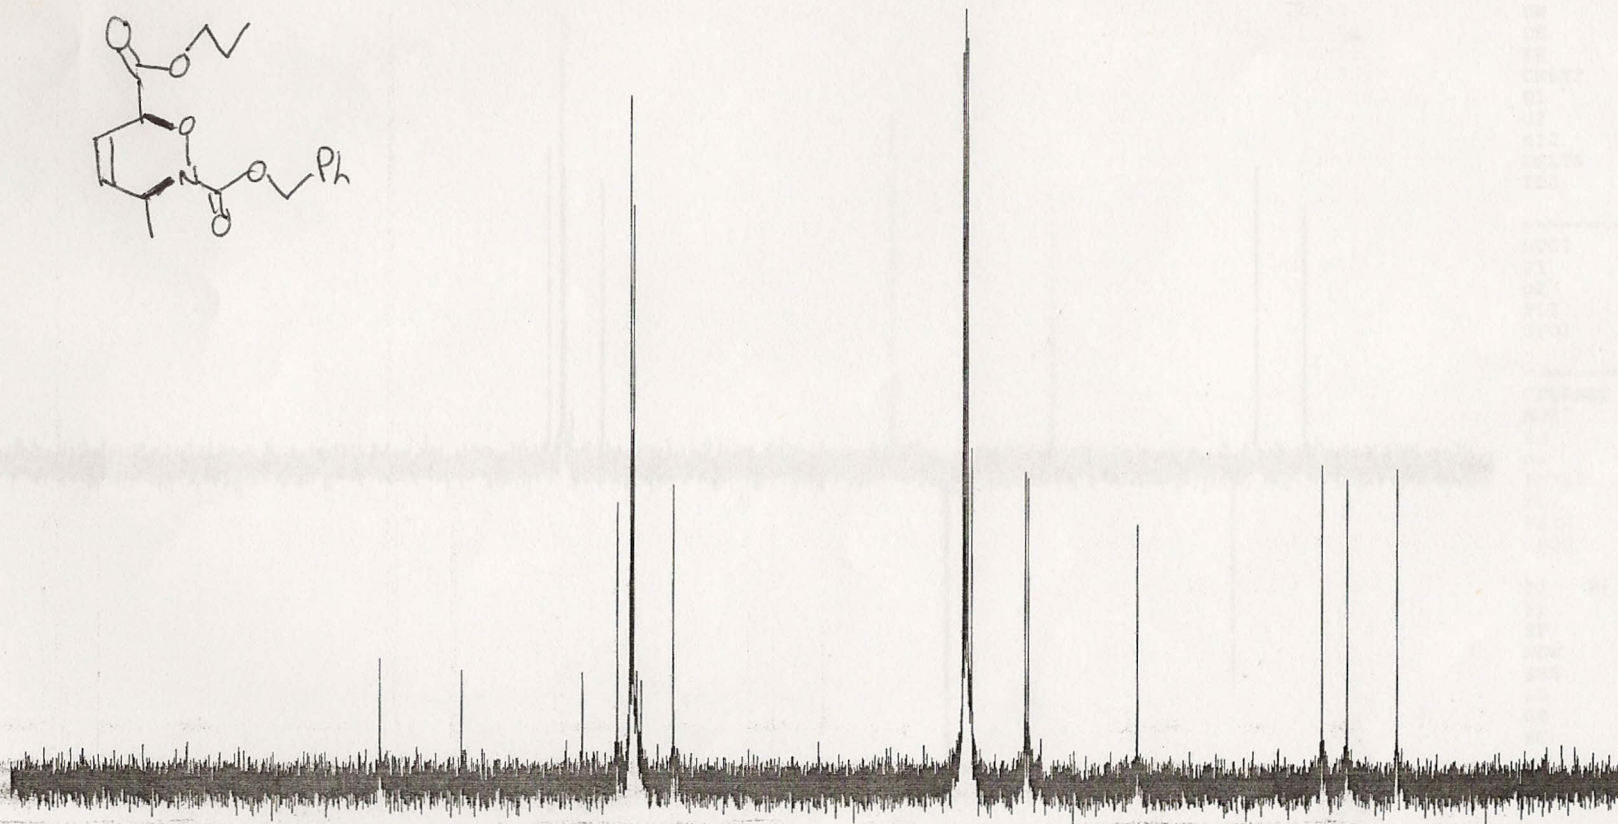

Current Data Parameters  
NAME Feb27-2008  
EXPNO 142  
PROCNO 1

F2 - Acquisition Parameters  
Date 20080228  
Time 5.56  
INSTRUM spect  
PROBHD 5 mm QNP 1H/13  
PULPROG zgpg30  
TD 32768  
SOLVENT CDC13  
NS 1024  
DS 4  
SWH 25125.629 Hz  
FIDRES 0.766773 Hz  
AQ 0.6521332 sec  
RG 10321.3  
DW 19.900 usec  
DE 6.00 usec  
TE 297.1 K  
D1 1.00000000 sec  
d11 0.03000000 sec  
DELTA 0.89999998 sec  
TDO 1

==== CHANNEL f1 =====  
NUC1 13C  
P1 11.12 usec  
PL1 5.00 dB  
SFO1 100.6227898 MHz

==== CHANNEL f2 =====  
CPDPRG2 waltz16  
NUC2 1H  
PCPD2 80.00 usec  
PL2 -3.00 dB  
PL12 16.37 dB  
PL13 18.00 dB  
SFO2 400.1316005 MHz

F2 - Processing parameters  
SI 65536  
SF 100.6127290 MHz  
WDW EM  
SSB 0  
LB 1.00 Hz  
GB 0  
PC 1.40

lab number AVS  
 L Bollans  
 BPivBoc  
 proton.liv CDC13 {D:\Bruker\TOPSPIN} san 19

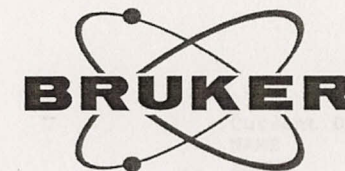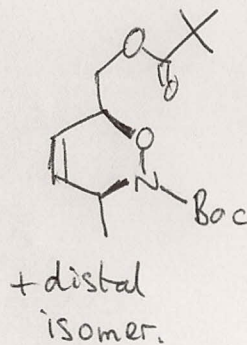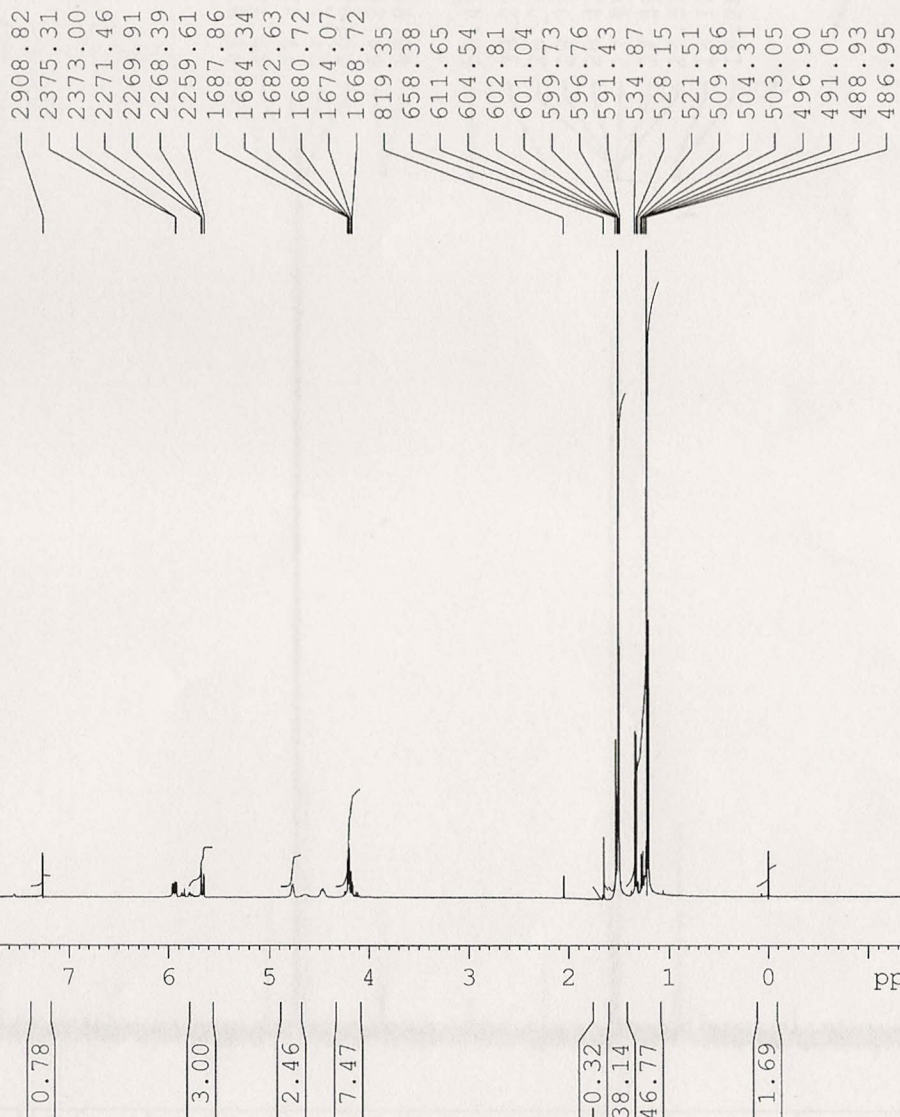

Current Data Parameters  
 NAME Jan07-2009  
 EXPNO 190  
 PROCNO 1

F2 - Acquisition Parameters  
 Date 20090107  
 Time 19.43  
 INSTRUM spect  
 PROBHD 5 mm QNP 1H/13  
 PULPROG zg  
 TD 32768  
 SOLVENT CDC13  
 NS 64  
 DS 2  
 SWH 6218.905 Hz  
 FIDRES 0.189786 Hz  
 AQ 2.6345973 sec  
 RG 1  
 DW 80.400 usec  
 DE 6.00 usec  
 TE 294.5 K  
 D1 2.00000000 sec  
 TD0 1

===== CHANNEL f1 =====  
 NUC1 1H  
 P1 13.25 usec  
 PL1 3.00 dB  
 SFO1 400.1325018 MHz

F2 - Processing parameters  
 SI 65536  
 SF 400.1300056 MHz  
 WDW GM  
 SSB 0  
 LB -0.50 Hz  
 GB 0.3  
 PC 1.00



lab number AVS  
 L Bollans  
 BSAc/Boc  
 proton.liv CDC13 {D:\Bruker\TOPSPIN} san 13

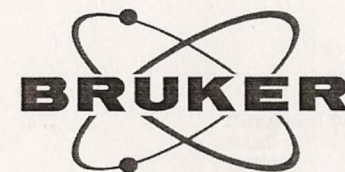

Current Data Parameters  
 NAME Aug20-2008  
 EXPNO 130  
 PROCNO 1

F2 - Acquisition Parameters  
 Date 20080820  
 Time 18.10  
 INSTRUM spect  
 PROBHD 5 mm QNP 1H/13  
 PULPROG zg  
 TD 32768  
 SOLVENT CDC13  
 NS 64  
 DS 2  
 SWH 6218.905 Hz  
 FIDRES 0.189786 Hz  
 AQ 2.6345973 sec  
 RG 1  
 DW 80.400 usec  
 DE 6.00 usec  
 TE 292.3 K  
 D1 2.00000000 sec  
 TD0 1

==== CHANNEL f1 =====  
 NUC1 1H  
 P1 13.25 usec  
 PL1 3.00 dB  
 SFO1 400.1325018 MHz

F2 - Processing parameters  
 SI 65536  
 SF 400.1300035 MHz  
 WDW GM  
 SSB 0  
 LB -0.50 Hz  
 GB 0.3  
 PC 1.00

2910.70  
 2380.08  
 2377.73  
 2375.49  
 2270.03  
 2268.43  
 2266.87  
 2258.17  
 1711.60  
 1708.53  
 1699.42  
 1696.40  
 1654.28  
 1647.06  
 1642.10  
 1634.86  
 844.85  
 839.86  
 827.06  
 820.23  
 686.74  
 615.03  
 611.86  
 601.81  
 599.79  
 534.19  
 527.46  
 510.21  
 504.94  
 503.41  
 0.00

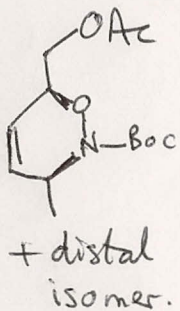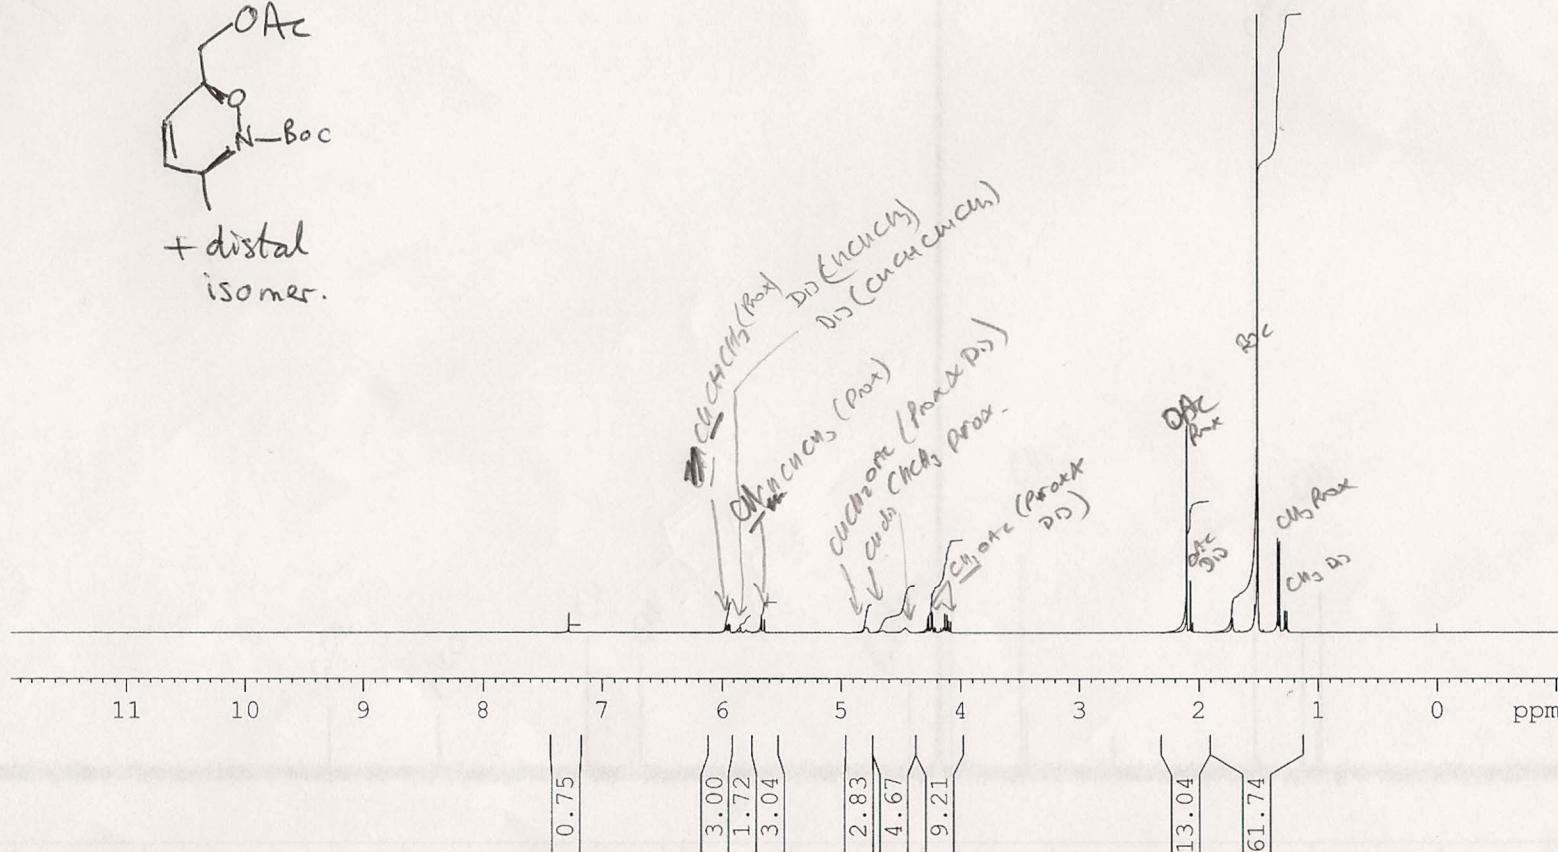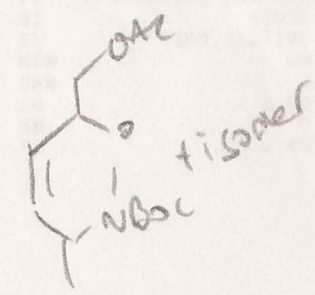

Supplement: b912963d-2.pdf [file b912963d-2.pdf]
