# Supplementary material for: The acyl nitroso Diels–Alder (ANDA) reaction of sorbate derivatives: an X-ray and 15N NMR study with an application to amino-acid synthesis
Source: Royal Society of Chemistry journal article supplement (doi:10.1039/b912963d), 2009-01-01
Supplement: b912963d-1.pdf [file b912963d-1.pdf]

## The acyl nitroso Diels-Alder (ANDA) reaction of sorbate derivatives: an X-ray and <sup>15</sup>N NMR study with an application to amino-acid synthesis

Lee Bollans,<sup>1</sup> Daniel O'Farrell,<sup>1</sup> John Bacsa,<sup>1</sup> Jonathan A. Iggo,<sup>1</sup> Gareth A. Morris<sup>2</sup> and Andrew V. Stachulski<sup>1,\*</sup>

<sup>1</sup>*Robert Robinson Laboratories, Department of Chemistry, University of Liverpool, Liverpool L69 7ZD. E-mail: stachuls@liv.ac.uk; Fax: 44 (0) 151 794 3588; Tel: 44 (0) 151 794 354*

<sup>2</sup>*School of Chemistry, University of Manchester, Oxford Rd., Manchester, M13 9PL*

### Supplementary Information

This document contains:

1. Tabulated data on ANDA reactions of sorbate esters and sorbic alcohol and derived esters (Tables 1 and 2).
2. Experimental data and characterisations of compounds not presented in the main paper.
3. Crystal structure data.
4. High resolution <sup>1</sup>H 2D NMR data for compound **10e**.
5. Additional references.

*Also NMR photocopy spectra for compounds in both the main paper and this SI document which do not have microanalytical data are included as a separate file.*

The numbering schemes follow those of the main paper with a few obvious additions, e. g. sorbate esters other than ethyl become **3b**, **3c**... etc and their derived ANDA adducts become **5c**, **5d**... etc.

## Sorbate Esters

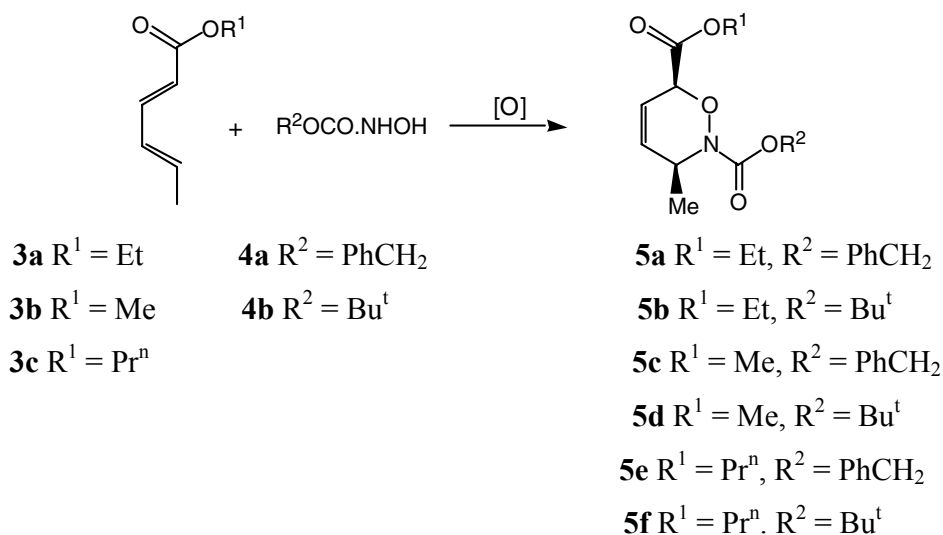

**Scheme 2.** Reagents: Na<sup>+</sup> IO<sub>4</sub><sup>-</sup>, or Bu<sup>n</sup><sub>4</sub>N<sup>+</sup> IO<sub>4</sub><sup>-</sup>, conditions as Table 1.

**Table 1.** The acyl nitroso Diels-Alder reaction of sorbate esters with alkoxy carbonyl nitroso compounds.

| Entry | Diene                 | Hydroxylamine         | Oxidant                                                                  | Solvent                     | Temp. °C | Yield %      |
|-------|-----------------------|-----------------------|--------------------------------------------------------------------------|-----------------------------|----------|--------------|
| 1     | <b>3b</b>             | <b>4b</b>             | NaIO <sub>4</sub>                                                        | MeOH: H <sub>2</sub> O, 1:1 | 0°C      | 36 <b>5d</b> |
| 2     | <b>3a</b>             | <b>4b</b>             | NaIO <sub>4</sub>                                                        | MeOH: H <sub>2</sub> O, 1:1 | 0°C      | 47 <b>5b</b> |
| 3     | <b>3c<sup>a</sup></b> | <b>4b</b>             | NaIO <sub>4</sub>                                                        | MeOH: H <sub>2</sub> O, 1:1 | 0°C      | 34 <b>5f</b> |
| 4     | <b>3b</b>             | <b>4a</b>             | NaIO <sub>4</sub>                                                        | MeOH: H <sub>2</sub> O, 1:1 | 0°C      | 34 <b>5c</b> |
| 5     | <b>3a</b>             | <b>4a</b>             | NaIO <sub>4</sub>                                                        | MeOH: H <sub>2</sub> O, 1:1 | 0°C      | 51 <b>5a</b> |
| 6     | <b>3c<sup>a</sup></b> | <b>4a</b>             | NaIO <sub>4</sub>                                                        | MeOH: H <sub>2</sub> O, 1:1 | 0°C      | 41 <b>5e</b> |
| 7     | <b>3a</b>             | <b>4a</b>             | NaIO <sub>4</sub>                                                        | MeOH: H <sub>2</sub> O, 1:1 | -10°C    | 60 <b>5a</b> |
| 8     | <b>3a</b>             | <b>4a</b>             | NaIO <sub>4</sub>                                                        | EtOAc:buffer <sup>b</sup>   | 0°C      | 48 <b>5a</b> |
| 9     | <b>3a</b>             | <b>4a<sup>c</sup></b> | Bu <sup>n</sup> <sub>4</sub> N <sup>+</sup> IO <sub>4</sub> <sup>-</sup> | MeOH                        | 0°C      | 64 <b>5a</b> |
| 10    | <b>3a</b>             | <b>4a<sup>c</sup></b> | Bu <sup>n</sup> <sub>4</sub> N <sup>+</sup> IO <sub>4</sub> <sup>-</sup> | MeOH                        | 0°C      | 69 <b>5a</b> |
| 11    | <b>3a</b>             | <b>4a<sup>c</sup></b> | NaIO <sub>4</sub>                                                        | MeOH: H <sub>2</sub> O, 1:1 | 0°C      | 62 <b>5a</b> |
| 12    | <b>3a</b>             | <b>4a<sup>d</sup></b> | NaIO <sub>4</sub> <sup>d</sup>                                           | MeOH: H <sub>2</sub> O, 1:1 | -15°C    | 85 <b>5a</b> |
| 13    | <b>3a</b>             | <b>4a</b>             | NaIO <sub>4</sub>                                                        | THF: H <sub>2</sub> O       | 0°C      | 64 <b>5a</b> |

|    |           |           |                                                                          |                                 |     |              |
|----|-----------|-----------|--------------------------------------------------------------------------|---------------------------------|-----|--------------|
| 14 | <b>3a</b> | <b>4a</b> | NaIO <sub>4</sub>                                                        | MeOH <sup>c</sup>               | 0°C | 55 <b>5a</b> |
| 15 | <b>3a</b> | <b>4a</b> | Bu <sup>n</sup> <sub>4</sub> N <sup>+</sup> IO <sub>4</sub> <sup>-</sup> | CH <sub>2</sub> Cl <sub>2</sub> | 0°C | 40 <b>5a</b> |

**Notes:** Unless otherwise stated, diene (1 eq) was reacted with hydroxylamine (1.1 eq) and oxidant (1.1 eq) with the oxidant added last, dropwise, over 10 min. <sup>a</sup> A further reduction in yield was observed with both the n-butyl and t-butyl esters (to 26%), using either **4a** or **4b**. <sup>b</sup> Citric acid buffer at pH6 was used, cf. ref. 17. <sup>c</sup> Inverse addition, viz. hydroxylamine added to mixture of diene and oxidant. <sup>d</sup> 2 eq. of both **4a** and NaIO<sub>4</sub> used. <sup>e</sup> No water used, addition over 3h. <sup>f</sup> 0.5 eq oxidant, cf. ref. 12, reaction time 2.5h.

### Sorbic Alcohol and Derivatives

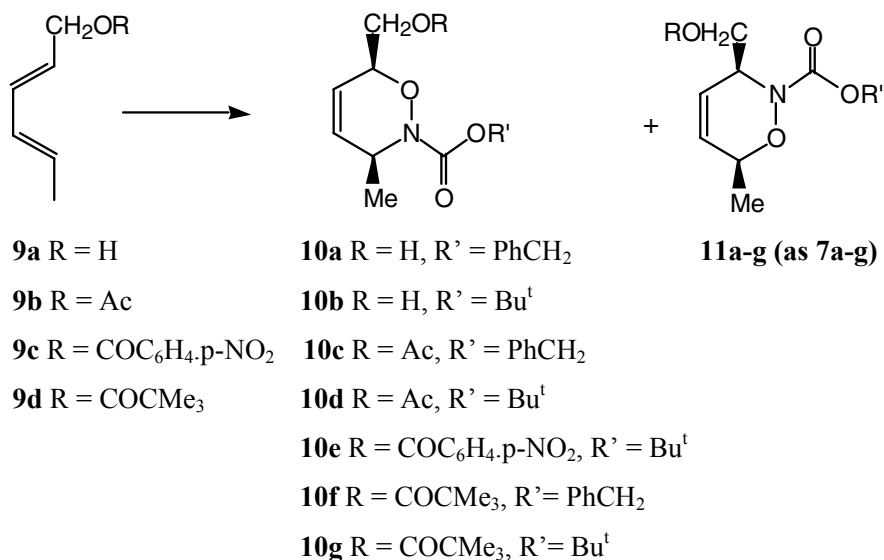

**Scheme 4.** ANDA Reaction of sorbic alcohol and derived esters. Reagents, as Scheme 2.

**Table 2.** The acyl nitroso Diels Alder reaction of sorbic alcohol and its esters.

| Entry | Diene     | Hydroxylamine | Oxidant                                                                     | Solvent                         | Yield %         | Prods.          | <b>10:11</b> |
|-------|-----------|---------------|-----------------------------------------------------------------------------|---------------------------------|-----------------|-----------------|--------------|
| 1     | <b>9a</b> | <b>4b</b>     | NaIO <sub>4</sub>                                                           | MeOH: H <sub>2</sub> O, 1:1     | NI <sup>a</sup> | <b>10b, 11b</b> | 3:1          |
| 2     | <b>9a</b> | <b>4a</b>     | Bu <sup>n</sup> <sub>4</sub> N <sup>+</sup><br>IO <sub>4</sub> <sup>-</sup> | CH <sub>2</sub> Cl <sub>2</sub> | 87              | <b>10a, 11a</b> | 3:2          |
| 3     | <b>9b</b> | <b>4b</b>     | Bu <sup>n</sup> <sub>4</sub> N <sup>+</sup><br>IO <sub>4</sub> <sup>-</sup> | CH <sub>2</sub> Cl <sub>2</sub> | 89              | <b>10d, 11d</b> | 4:1          |
| 4     | <b>9b</b> | <b>4a</b>     | Bu <sup>n</sup> <sub>4</sub> N <sup>+</sup>                                 | CH <sub>2</sub> Cl <sub>2</sub> | 82              | <b>10c, 11c</b> | 5:1          |

|   |           |           |                                             |                                 |    |                 |     |  |
|---|-----------|-----------|---------------------------------------------|---------------------------------|----|-----------------|-----|--|
|   |           |           | IO <sub>4</sub> <sup>-</sup>                |                                 |    |                 |     |  |
| 5 | <b>9b</b> | <b>4a</b> | NaIO <sub>4</sub>                           | MeOH: H <sub>2</sub> O, 1:1     | 38 | <b>10c, 11c</b> | 4:1 |  |
| 6 | <b>9c</b> | <b>4b</b> | Bu <sup>n</sup> <sub>4</sub> N <sup>+</sup> | CH <sub>2</sub> Cl <sub>2</sub> | 76 | <b>10e, 11e</b> | 7:1 |  |
|   |           |           | IO <sub>4</sub> <sup>-</sup>                |                                 |    |                 |     |  |
| 7 | <b>9d</b> | <b>4a</b> | Bu <sup>n</sup> <sub>4</sub> N <sup>+</sup> | CH <sub>2</sub> Cl <sub>2</sub> | 76 | <b>10f, 11f</b> | 4:1 |  |
|   |           |           | IO <sub>4</sub> <sup>-</sup>                |                                 |    |                 |     |  |
| 8 | <b>9d</b> | <b>4b</b> | Bu <sup>n</sup> <sub>4</sub> N <sup>+</sup> | CH <sub>2</sub> Cl <sub>2</sub> | 75 | <b>10g, 11g</b> | 5:1 |  |
|   |           |           | IO <sub>4</sub> <sup>-</sup>                |                                 |    |                 |     |  |

**Notes:** <sup>a</sup> Not isolated free of unreacted **9a**; yield by NMR, ca. 60%

## Experimental

**Esterification Reaction General Methods. Method 1:** Sorbic acid [(2E,4E)-hexa-2,4-dienoic acid; 1 equiv.] was dissolved in excess alcohol used and conc. H<sub>2</sub>SO<sub>4</sub> (2-6 drops) added. The solution was stirred under reflux for 4 h. After the reaction had cooled to ambient temperature, water and ether were added, the layers separated and the aqueous layer washed again with ether. The combined ethereal layers were washed with sat. aq. NaHCO<sub>3</sub> (x 2) then brine. The ethereal layer was dried (MgSO<sub>4</sub>), filtered and concentrated *in vacuo* to give pure alkyl sorbate as a yellow oil or liquid.

**Method 2 (Me ester):** All glassware was dried before use. To sorbic acid [(2E,4E)-hexa-2,4-dienoic acid; 1 equiv.] in dry toluene and dry methanol (3.5:1 v/v) under N<sub>2</sub> was slowly added dropwise TMSCHN<sub>2</sub> (1.1 equiv.). After stirring for 75 min., during which time N<sub>2</sub> gas was evolved, the reaction was concentrated *in vacuo* to give the ester.

### (2E,4E)-Hexa-2,4-dienoic acid methyl ester (Methyl sorbate) **3b**:<sup>29</sup>

Yield 93% (method 2); δ<sub>H</sub> (200 MHz): 1.86 (3 H, d, *J* = 5.4 Hz, CH<sub>3</sub>CH), 3.74 (3 H, s, CO<sub>2</sub>Me), 5.78 (1 H, dd, *J* = 15.4 and 0.7 Hz, CHCO<sub>2</sub>Me), 6.00-6.30 (2 H, m, CHCH=CHCH) and 7.19-7.34 (1 H, m, =CHCH<sub>3</sub>); δ<sub>C</sub> (100 MHz): 18.9 (CH<sub>3</sub>CH, 1C), 51.7 (CO<sub>2</sub>Me, 1C), 119.0 (CHCH<sub>3</sub>, 1C), 130.2 (CHCHCH<sub>3</sub>, 1C), 139.7 (CHCHCO<sub>2</sub>Me, 1C), 145.5 (CHCO<sub>2</sub>Me, 1C) and 168.1 (CO<sub>2</sub>Me, 1C).

### (2E,4E)-Hexa-2,4-dienoic acid n-propyl ester (n-Propyl sorbate) **3c**:<sup>29,30</sup>

Yield 85% (method 1). Found: C, 68.7; H, 9.3.  $C_9H_{14}O_2 \cdot 0.2 H_2O$  requires C, 68.4; H, 9.1% (hygroscopic);  $\nu_{max}$  (film) 2966, 2881, 1711, 1645 and 1618  $cm^{-1}$ ;  $\delta_H$  (200 MHz): 0.98 (3 H, t,  $J = 7.2$  Hz,  $CH_3CH_2$ ), 1.58 (2 H, sextet,  $J = 7.0$  Hz,  $CH_3CH_2CH_2$ ), 1.86 (3 H, d,  $J = 4.7$  Hz,  $CH_3CH$ ), 4.10 (2 H, t,  $J = 6.7$  Hz,  $CO_2CH_2CH_2$ ), 5.75 (1 H, dd,  $J = 15.4$  and 0.7 Hz,  $CHCO_2Me$ ), 6.00-6.30 (2 H, m,  $CHCH=CHCH$ ) and 7.15-7.30 (1 H, m,  $CHCH_3$ );  $\delta_C$  (100 MHz): 10.8, 19.0, 22.4, 66.2, 119.4, 130.2, 139.5, 145.3 and 167.8; m/z (CI,  $NH_3$ ) 155 ( $MH^+$ , 72%) and 172 ( $MNH_4^+$ , 100%).

**3-Methyl-3,6-dihydro-[1,2]oxazine-2,6-dicarboxylic acid 2-benzyl ester 6-methyl ester 5c:**

Yield, see Table 1.  $\delta_H$  (400 MHz): 1.40 (3 H, d,  $J = 6.9$  Hz,  $CHCH_3$ ), 3.80 (3 H, s, OMe), 4.50 (1 H, m,  $CHCH_3$ ), 5.15 (1 H, m,  $CHCO_2Me$ ), 5.20 (2 H, ABq,  $OCH_2Ph$ ), 5.85 (1 H, m,  $=CHCHCO_2Me$ ), 5.95 (1 H, m,  $=CHCHCH_3$ ) and 7.35 (5 H, m, ArH);  $\delta_C$  (100 MHz): 18.3 ( $CH_3CH$ , 1C), 50.9 ( $CHCH_3$ , 1C), 53.0 ( $CO_2Me$ , 1C), 65.7 ( $CH_2Ph$ , 1C), 70.0 ( $=CHCO_2Me$ , 1C), 127.4, 128.0, 128.5, 128.7, 129.0 (ArC, 5C), 122.2 ( $=CHCHCO_2Me$ , 1C), 131.0 ( $=CHCHCH_3$ , 1C), 136.3 (ArC, 1C), 155.2 ( $NC(O)CH_2Ph$ , 1C) and 168.1 ( $CHC(O)OMe$ , 1C); m/z (CI,  $NH_3$ ) 309 ( $[M+NH_4]^+$ , 60%), 292 ( $[M+H]^+$ , 15%) and 203 ( $[M-OCH_2Ph+H]^+$ , 12%). Found (CI,  $NH_3$ ): m/z 309.14475,  $C_{15}H_{21}N_2O_5$  ( $[M+NH_4]^+$ ) requires 309.14505. This compound has not previously been reported in *racemic* form, but has been obtained as a single enantiomer with chirality derived from D-ribose.<sup>31</sup>

**2-tert-Butyl 6-methyl 3-methyl-2H-1,2-oxazine-2,6(3H,6H)-dicarboxylate 5d:**

Yield, see Table 1.  $\delta_H$  (400 MHz): 1.35 (3 H, d,  $J = 6.7$  Hz,  $CH_3CH$ ), 1.50 (9 H, s,  $CMe_3$ ), 3.81 (3 H, s,  $CO_2Me$ ), 4.45 (1 H, m,  $CHCH_3$ ), 5.15 (1 H, d,  $J = 1.6$  Hz,  $CHCO_2Me$ ), 5.90 (1 H, m,  $=CHCHCO_2Et$ , 1H) and 6.00 (1 H, m,  $CHCHCH_3$ );  $\delta_C$  (100 MHz): 18.3 ( $CH_3CH$ , 1C), 28.7 ( $CMe_3$ , 3C), 50.8 ( $CHCH_3$ , 1C), 53.0 ( $CO_2Me$ , 1C), 76.0 ( $CHCO_2Me$ , 1C), 82.4 ( $CMe_3$ , 1C), 122.3 ( $=CHCHCO_2Me$ , 1C), 131.2 ( $=CHCHCH_3$ , 1C), 154.5 ( $NC(O)OC(Me)_3$ , 1C) and 168.3 ( $CHC(O)OMe$ , 1C); m/z (CI,  $NH_3$ ): 275 ( $[M+NH_4]^+$ , 41%), 258 ( $MH^+$ , 7%), 219 ( $[M-Bu^t+NH_4]^+$ , 100%), 203 ( $[M-CO_2Me]^+$ , 22%), 201 ( $[M-tBu]^+$ , 18%), 157 ( $[M-Boc+H]^+$ , 42%) and 142 ( $[M-NBoc]^+$ , 39%).

**2-Benzyl 6-propyl 3-methyl-2H-1,2-oxazine-2,6(3H,6H)-dicarboxylate 5e:**

Yield, see Table 1.  $\delta_{\text{H}}$  (400 MHz): 0.97 (3 H, t,  $J = 7.4$  Hz,  $\text{CH}_3\text{CH}_2$ ), 1.35 (3 H, d,  $J = 6.7$  Hz,  $\text{CH}_3\text{CH}$ ), 1.70 (2 H, sextet,  $J = 7.2$  Hz,  $\text{CH}_2\text{CH}_2\text{CH}_3$ ), 4.15 (2 H, t,  $J = 6.5$  Hz,  $\text{CO}_2\text{CH}_2\text{CH}_2$ ), 4.45 (1 H, m,  $\text{CHCH}_3$ ), 5.25 (3 H, m,  $\text{CHCO}_2\text{nPr}$  and  $\text{OCH}_2\text{Ph}$ ), 5.90 (1 H, m,  $=\text{CHCHCO}_2\text{Pr}^{\text{n}}$ , 1H), 6.00 (1 H, m,  $=\text{CHCHCH}_3$ , 1H) and 7.35 (5 H, m,  $\text{CH}_2\text{Ph}$ );  $\delta_{\text{C}}$  (100 MHz): 10.7 ( $\text{CH}_3\text{CH}_2$ , 1C), 18.4 ( $\text{CH}_3\text{CH}$ , 1C), 22.2 ( $\text{CH}_2\text{CH}_3$ , 1C), 50.9 ( $\text{CHCH}_3$ , 1C), 67.7 ( $\text{CO}_2\text{CH}_2\text{CH}_2$ ), 68.1 ( $\text{OCH}_2\text{Ph}$ , 1C), 76.5 ( $\text{CHCO}_2\text{nPr}$ , 1C), 122.4 ( $=\text{CHCHCO}_2\text{Pr}^{\text{n}}$ ), 127.4 ( $=\text{CHCHCH}_3$ , 1C), 128.0, 128.5, 128.7, 128.9, 129.4 (ArC, 5C), 136.3 (ArC, 1C), 155.2 ( $\text{NC}(\text{O})\text{OC}(\text{Me})_3$ , 1C) and 167.7 ( $\text{CHC}(\text{O})\text{OnPr}$ , 1C); m/z (CI): 337 ( $[\text{M}+\text{NH}_4]^+$ , 100%), 320 ( $[\text{M}+\text{H}]^+$ , 26%), 258 ( $[\text{M}-\text{OnPr}+\text{H}]^+$ , 42%). Found (CI,  $\text{NH}_3$ ) m/z, 320.15036,  $\text{C}_{17}\text{H}_{22}\text{NO}_5$  ( $[\text{M}+\text{H}]^+$ ) requires 320.14980.

**2-tert-Butyl 6-n-propyl 3-methyl-2H-1,2-oxazine-2,6(3H,6H)-dicarboxylate 5f:**

Yield, see Table 1.  $\delta_{\text{H}}$  (400 MHz): 0.97 (3 H, t,  $J = 7.4$  Hz,  $\text{CH}_3\text{CH}_2$ ), 1.35 (3 H, d,  $J = 6.8$  Hz,  $\text{CH}_3\text{CH}$ ), 1.59 (9 H, s,  $\text{CMe}_3$ ), 1.70 (3 H, sextet,  $J = 7.0$  Hz,  $\text{CH}_2\text{CH}_2\text{CH}_3$ ), 4.15 (2 H, t,  $J = 6.7$  Hz,  $\text{CO}_2\text{CH}_2\text{CH}_2$ ), 4.45 (1 H, m,  $\text{CHCH}_3$ ), 5.15 (1 H, d,  $J = 1.6$  Hz,  $\text{CHCO}_2\text{Pr}^{\text{n}}$ ), 5.90 (1 H, m,  $=\text{CHCHCO}_2\text{Pr}^{\text{n}}$ ) and 6.00 (1 H, m,  $=\text{CHCHCH}_3$ );  $\delta_{\text{C}}$  (100 MHz): 10.6 ( $\text{CH}_3\text{CH}_2$ , 1C), 18.4 ( $\text{CH}_3\text{CH}$ , 1C), 22.2 ( $\text{CH}_2\text{CH}_3$ , 1C), 28.4 ( $\text{CMe}_3$ , 3C), 50.7 ( $\text{CHCH}_3$ , 1C), 67.6 ( $\text{CO}_2\text{CH}_2\text{CH}_2$ , 1C), 75.9 ( $\text{CHCO}_2\text{Pr}^{\text{n}}$ , 1C), 82.3 ( $\text{CMe}_3$ , 1C), 122.4 ( $=\text{CHCHCO}_2\text{Pr}^{\text{n}}$ , 1C), 131.2 ( $=\text{CHCHCH}_3$ , 1C), 154.6 ( $\text{NC}(\text{O})\text{OCMe}_3$ , 1C) and 167.9 ( $\text{CHC}(\text{O})\text{OPr}^{\text{n}}$ , 1C); m/z (ES+ve): 609 ( $[\text{2M}+\text{K}]^+$ ), 593 ( $[\text{2M}+\text{Na}]^+$ ), 324 ( $[\text{M}+\text{K}]^+$ ), 308 ( $[\text{M}+\text{Na}]^+$ ). Found (ES+ve): 308.1474,  $\text{C}_{14}\text{H}_{23}\text{NO}_5\text{Na}$  ( $[\text{M}+\text{Na}]^+$ ) requires 308.1474.

**tert-Butyl 6-(hydroxymethyl)-3-methyl-3,6-dihydro-2H-1,2-oxazine-2-carboxylate**

**(proximal and distal isomers) 10b, 11b:**<sup>12</sup> Yield, see Table 2. For **10b**: Found: m/z, 247.16528.  $\text{C}_{11}\text{H}_{23}\text{N}_2\text{O}_4$  ( $[\text{M}+\text{NH}_4]^+$ ) requires m/z, 247.16578;  $\delta_{\text{H}}$  (200 MHz): 1.32 (3 H, d,  $J = 6.7$  Hz,  $\text{CH}_3\text{CH}$ ), 1.51 (9 H, s,  $\text{CMe}_3$ ), 3.60-3.83 (2 H, m,  $\text{CHCH}_2\text{OH}$ ), 4.45 (1 H, m,  $\text{CHCH}_3$ ), 4.64 (1 H, m,  $\text{CHCH}_2\text{OH}$ ), 5.75 (1 H, ddd,  $J = 10.3$ , 1.7 and 1.5 Hz,  $=\text{CHCHCH}_2\text{OH}$ ) and 5.87 (1 H, ddd,  $J = 10.3$ , 4.4 and 2.2 Hz,  $=\text{CHCHCH}_3$ );  $\delta_{\text{C}}$  (100 MHz): 19.2 ( $\text{CH}_3\text{CH}$ , 1C), 28.7 ( $\text{CMe}_3$ , 3C), 51.0 ( $\text{CH}_3\text{CH}$ , 1C), 64.0 ( $\text{CH}_2\text{OH}$ , 1C), 79.0 ( $\text{CHCH}_2\text{OH}$ , 1C), 82.1 ( $\text{CMe}_3$ , 1C), 124.3 ( $=\text{CHCHCH}_2\text{OH}$ , 1C), 130.8 ( $=\text{CHCHCH}_3$ , 1C) and 154.9 ( $\text{NC}(\text{O})\text{OCMe}_3$ , 1C); m/z (CI,  $\text{NH}_3$ ): 247 ( $[\text{M}+\text{NH}_4]^+$ , 4%), 230 ( $[\text{M}+\text{H}]^+$ ,

2%), 173 ([M-tBu]<sup>+</sup>, 14%), 130 ([M-Boc+H]<sup>+</sup>, 42%), 100 ([M-ONBoc+H]<sup>+</sup>, 35%). The distal isomer **11b** was distinguished by  $\delta_{\text{H}}$  (200 MHz): 1.26 (3 H, d,  $J^2 = 6.7$ ,  $\text{CH}_3\text{CH}$ ), 1.48 (9 H, s,  $\text{CMe}_3$ ) and 5.75-5.85 (2 H, m,  $\text{CHCH}=\text{CHCH}$ );  $\delta_{\text{C}}$  (100 MHz): 18.5 ( $\text{CH}_3\text{CH}$ , 1C), 82.4 ( $\text{Me}_3\text{C}$ , 1C), 123.0 ( $\text{CHCHCH}_3$ , 1C), and 131.7 ( $=\text{CHCHCH}_2\text{OH}$ , 1C).

**Benzyl 6-(acetoxymethyl)-3-methyl-3,6-dihydro-2H-1,2-oxazine-2-carboxylate**

**(proximal and distal isomers) 10c, 11c:** Yield, see Table 2. For **10c**: Found: C, 63.5; H, 6.4; N, 4.3.  $\text{C}_{16}\text{H}_{19}\text{NO}_5$  requires C, 62.94; H, 6.3; N, 4.6%;  $\delta_{\text{H}}$  (400 MHz): 1.35 (3 H, d,  $J = 6.7$  Hz,  $\text{CH}_3\text{CH}$ ), 2.05 (3 H, s,  $\text{CH}_3\text{CO}$ ), 4.17 (2 H, dd,  $J = 12.2$  and 3.5 Hz;  $J = 12.2$  and 3.1 Hz,  $\text{CHCH}_2\text{OAc}$ ), 4.65 (1 H, m,  $\text{CHCH}_3$ ), 4.80 (1 H, m,  $\text{CHCH}_2\text{OAc}$ ), 5.20 (2 H, ABq,  $\text{OCH}_2\text{Ph}$ ), 5.65 (1 H, m,  $=\text{CHCHCH}_2\text{OAc}$ ), 5.95 (1 H, m,  $=\text{CHCHCH}_3$ ) and 7.35 (5 H, m, ArH);  $\delta_{\text{C}}$  (100 MHz): 18.5 ( $\text{CH}_3\text{CH}$ , 1C), 21.1 ( $\text{CH}_3\text{CO}$ , 1C), 50.8 ( $\text{CHCH}_3$ , 1C), 64.4 ( $\text{CH}_2\text{OAc}$ , 1C), 68.0 ( $\text{OCH}_2\text{Ph}$ , 1C), 74.0 ( $\text{CHCH}_2\text{OAc}$ , 1C), 123.4 ( $=\text{CHCHCH}_2\text{OAc}$ , 1C), 128.3, 128.4, 128.6, 128.9, 131.2 and 132.5 ( $=\text{CHCHCH}_3$ , 1C), (ArC for proximal and distal), 136.4 (ArC, 1C), 155.2 ( $\text{NC(O)OCH}_2\text{Ph}$ , 1C) and 171.2 ( $\text{CH}_2\text{OC(O)CH}_3$ , 1C);  $m/z$  (CI,  $\text{NH}_3$ ): 323 ([M+ $\text{NH}_4$ ]<sup>+</sup>, 100%), 306 ([M+H]<sup>+</sup>, 35%), 262 ([M-C(O)CH<sub>3</sub>]<sup>+</sup>, 42%), 108 ([M-C<sub>9</sub>H<sub>12</sub>NO<sub>4</sub>]<sup>+</sup>, 18%). Found (CI,  $\text{NH}_3$ ):  $m/z$  306.13481,  $\text{C}_{16}\text{H}_{20}\text{NO}_5$  ([M+H]<sup>+</sup>) requires 306.13415. The distal isomer **11c** was distinguished by  $\delta_{\text{H}}$  (400 MHz): 1.28 (3 H, d,  $J = 6.7$  Hz,  $\text{CH}_3\text{CH}$ ), 4.50 (1 H, m,  $\text{CHCH}_3$ ), 5.75 (1 H, m,  $=\text{CHCHCH}_3$ ) and 6.85 (1 H, m,  $=\text{CHCHCH}_2\text{OAc}$ );  $\delta_{\text{C}}$  (100 MHz): 19.0 ( $\text{CH}_3\text{CH}$ , 1C), 63.6 ( $\text{CH}_2\text{OAc}$ , 1C), 72.1 ( $\text{CHCH}_2\text{OAc}$ , 1C), 122.2 ( $=\text{CHCHCH}_3$ , 1C) and 133.2 ( $=\text{CHCHCH}_2\text{OAc}$ , 1C) with other signals overlapping.

**(2E, 4E)-Hexa-2,4-dienyl-4-pivalate 9d:** A solution of (2E, 4E)-hexa-2,4-dienol (1.02g, 10.4 mmol) and pyridine (0.91 mL, 1.1 equiv.) in anhydrous DCM (5 mL) was treated with pivalyl chloride (1.38 mL, 1.1 equiv.) added dropwise at 0°C, then left to stir at 20°C for 6 hours. The white pyridine hydrochloride precipitate was removed by filtration, then the organic layer was diluted with Et<sub>2</sub>O (30 mL) and washed with 1 M HCl (3x 30 mL) and brine. After drying ( $\text{Na}_2\text{SO}_4$ ) and filtering, the solvent was removed *in vacuo* to give the ester **9d** as a yellow liquid (1.80g, 95%). Found: C, 72.1; H, 9.9;  $m/z$ , 200.16519.  $\text{C}_{11}\text{H}_{18}\text{O}_2$  requires C, 72.5; H, 10.0%;  $\text{C}_{11}\text{H}_{22}\text{NO}_2$  ([M+ $\text{NH}_4$ ]<sup>+</sup>) requires

200.16505;  $\nu_{\max}$  (cm<sup>-1</sup>) 2970, 1732 and 1662;  $\delta_{\text{H}}$  (200 MHz, CDCl<sub>3</sub>): 1.20 (9 H, s, Me<sub>3</sub>C), 1.77 (3 H, d,  $J$  = 6.7 Hz, CH<sub>3</sub>CH), 4.56 (2 H, d,  $J$  = 6.6 Hz, CH<sub>2</sub>OPiv), 5.50-5.85 (2 H, m, 2x =CH) and 6.00-6.35 (2 H, m, 2x =CH);  $\delta_{\text{C}}$  (100 MHz, CDCl<sub>3</sub>): 18.4 (CH<sub>3</sub>CH), 27.6 (Me<sub>3</sub>C C=O), 39.1 (CH<sub>2</sub>OPiv), 65.1 (Me<sub>3</sub>CC=O), 124.5 (CHCH<sub>3</sub>), 130.9 (x2) (CHCHCHCH), 134.6 (CHCH<sub>2</sub>OPiv) and 178.6 (Me<sub>3</sub>CC=O);  $m/z$  (CI, NH<sub>3</sub>): 200 ([M+NH<sub>4</sub>]<sup>+</sup>, 38%), 182 ([M]<sup>+</sup>, 25%), 98 ([M-Piv]<sup>+</sup>, 100%) and 81 ([M-OPiv]<sup>+</sup>, 73%).

**Benzyl 6-[(pivalyloxy)methyl]-3-methyl-3,6-dihydro-2H-1,2-oxazine-2-carboxylate (proximal and distal isomers) 10f, 11f:** Yield, 76%, yellow oil (Table 2), P:D ratio = 4:1. Found: C, 65.8; H, 7.3; N, 4.0;  $m/z$  370.1617. C<sub>19</sub>H<sub>25</sub>NO<sub>5</sub> requires C, 65.7; H, 7.25; N, 4.0%; C<sub>19</sub>H<sub>25</sub>NO<sub>5</sub>Na (MNa<sup>+</sup>) requires  $m/z$ , 370.1630;  $\delta_{\text{H}}$  (400 MHz, CDCl<sub>3</sub>), for **10f**: 1.18 (9 H, s, CMe<sub>3</sub>), 1.34 (3 H, d,  $J$  = 6.7 Hz, CHCH<sub>3</sub>), 4.21 (2 H, d,  $J$  = 4.5 Hz, PivOCH<sub>2</sub>CH), 4.55 (1 H, m, CHCH<sub>3</sub>), 4.77 (1 H, m, CHCH<sub>2</sub>OPiv), 5.16 & 5.24 (2 H, ABq,  $J$  = 12.2 and 12.3 Hz, OCH<sub>2</sub>Ph), 5.65 and 5.67 (1 H, dt,  $J$  = 10.3 and 1.5 Hz, =CHCHCH<sub>2</sub>OPiv), 5.92 and 5.95 (1 H, ddd,  $J$  = 10.2, 4.0 and 1.9 Hz, =CHCHCH<sub>3</sub>) and 7.40 (5 H, m, ArH);  $\delta_{\text{C}}$  (100 MHz): 18.4 (CH<sub>3</sub>CH, 1C), 27.5 (Me<sub>3</sub>C, 3C), 50.7 (CH<sub>3</sub>CH), 64.0 (CH<sub>2</sub>OCO), 68.0 (ArCH<sub>2</sub>O), 76.5 (CHCH<sub>2</sub>OCO), 123.6 (CH=CHCH<sub>2</sub>OPiv), 127.4-129.1 (ArC<sub>x3</sub> + CH=CHCH<sub>3</sub>), 136.4 (ArC), 155.2 (NC(O)OCH<sub>2</sub>Ph) and 178.6 (CH<sub>2</sub>OCOCMe<sub>3</sub>);  $m/z$  (ES+ve mode) 717 [(2M+Na)<sup>+</sup>], 386 (MK<sup>+</sup>) and 370 (MNa<sup>+</sup>); the distal isomer **11f** was distinguished by  $\delta_{\text{H}}$  (400 MHz): 1.14 (9 H, s, Me<sub>3</sub>C), 1.28 (3 H, d,  $J$  = 6.7 Hz, CH<sub>3</sub>CH), 4.70 (1 H, m, CHCH<sub>3</sub>), 5.78 (1 H, m, =CHCHCH<sub>3</sub>) and 5.85 (1 H, m, =CHCHCH<sub>2</sub>OPiv);  $\delta_{\text{C}}$  (100 MHz): 19.1 (CH<sub>3</sub>CH), 63.6 (CH<sub>2</sub>OCO), 65.8 (CHCH<sub>3</sub>), with other signals overlapping.

**tert-Butyl 6-[(pivalyloxy)methyl]-3-methyl-3,6-dihydro-2H-1,2-oxazine-2-carboxylate (proximal and distal isomers) 10g, 11g:** Yield, 75%, yellow oil (Table 2), P:D ratio = 4:1. Found:  $m/z$  336.1797; C<sub>16</sub>H<sub>27</sub>NO<sub>5</sub>Na (MNa<sup>+</sup>) requires  $m/z$ , 336.1787;  $\delta_{\text{H}}$  (400 MHz, CDCl<sub>3</sub>), for **10g**: 1.22 (9 H, s, Me<sub>3</sub>C), 1.32 (3 H, d,  $J$  = 6.7 Hz, CH<sub>3</sub>CH), 1.50 (9 H, s, Me<sub>3</sub>CO), 4.21 (2 H, m, CHCH<sub>2</sub>OCO), 4.46 (1 H, m, CHCH<sub>3</sub>), 4.77 (1 H, m, CHCH<sub>2</sub>OCO), 5.66 (1 H, dt,  $J$  = 10.3 and 1.5 Hz, CHCHCH<sub>2</sub>OPiv), and 5.95 (1 H, ddd,  $J$  = 10.3, 4.7 and 2.3 Hz, CHCHCH<sub>3</sub>);  $\delta_{\text{C}}$  (100 MHz): 18.3 (CH<sub>3</sub>CH), 27.6, 28.8 (2xMe<sub>3</sub>C),



50.5 ( $\text{CH}_3\text{CH}$ ), 64.3 ( $\text{CHCH}_2\text{OCO}$ ), 75.9 ( $\text{CHCH}_2\text{OCO}$ ), 81.9 ( $2\times\text{Me}_3\text{C}$ ), 123.7 ( $=\text{CHCHCH}_2\text{OPiv}$ ), 131.2 ( $=\text{CHCHCH}_3$ ), 154.7 ( $\text{NHCOO}$ ) and 178.7 ( $\text{OCOCMe}_3$ );  $m/z$  (ES+ve mode) 649 [ $(2\text{M}+\text{Na})^+$ ], 352 ( $\text{MK}^+$ ) and 336 ( $\text{MNa}^+$ ); the distal isomer **11g** was distinguished by  $\delta_{\text{H}}$  (400 MHz): 1.20 (9 H, s,  $\text{Me}_3\text{C}$ ), 1.26 (3 H, d,  $J = 6.7$  Hz,  $\text{CH}_3\text{CH}$ ), 1.49 (9 H, s,  $\text{Me}_3\text{CO}$ ), 4.65 (1 H, m,  $\text{CHCH}_3$ ), 5.79 (1 H, ddd,  $J = 10.3, 4.1$  and  $1.8$  Hz,  $\text{CHCHCH}_3$ ), and 5.85 (1 H, d,  $J = 10.4$  Hz,  $\text{CHCHCH}_2\text{OPiv}$ );  $\delta_{\text{C}}$  (100 MHz): 19.1 ( $\text{CH}_3\text{CH}$ ), 28.0, 28.4 ( $2\times\text{Me}_3\text{C}$ ) and 63.9 ( $\text{CH}_2\text{OCO}$ ).

Compounds **12** and **13** were prepared from the appropriate diene (whose synthesis will be described in detail elsewhere) by the ANDA reaction, Method B (see main MS) with ZNHOH on a 2 mmolar scale in 79% overall yield. They were fully separated by chromatography:

**Benzyl 6-[(t-butoxycarbonylamino)methyl]-3-(hydroxymethyl)-3,6-dihydro-2H-1,2-oxazine-2-carboxylate 12.** Yield, 37%. Found:  $m/z$ , 401.1699;  $\text{C}_{19}\text{H}_{26}\text{N}_2\text{O}_6\text{Na}$  ( $\text{MNa}^+$ ) requires  $m/z$ , 401.1689;  $\delta_{\text{H}}$  (400 MHz,  $\text{CDCl}_3$ ): 1.45 (9 H, s,  $\text{Me}_3\text{C}$ ), 3.25-3.45 (2 H, m,  $\text{CHCH}_2\text{NHBoc}$ ), 3.75 (2 H, m,  $\text{CH}_2\text{OH}$ ), 4.55 (1 H, m,  $\text{CHCH}_2\text{OH}$ ), 4.65 (1 H, m,  $\text{CHCH}_2\text{NHBoc}$ ), 5.05 (1 H, br, NH), 5.21 (2 H, ABq,  $\text{OCH}_2\text{Ph}$ ), 5.80-5.95 (2 H, m,  $\text{CH}=\text{CH}$ ) and 7.35 (5 H, m, ArH);  $\delta_{\text{C}}$  (100 MHz): 28.7 ( $\text{Me}_3\text{C}$ ), 43.0 ( $\text{CH}_2\text{NHBoc}$ ), 57.2 ( $\text{CHCH}_2\text{OH}$ ), 63.5 ( $\text{CH}_2\text{OH}$ ), 68.4 ( $\text{CH}_2\text{Ph}$ ), 76.9 ( $\text{CHCH}_2\text{NHBoc}$ ), 80.0 ( $\text{Me}_3\text{C}$ ), 125.2 and 128.4 ( $\text{CH}=\text{CH}$ ), 129.0, 129.1, 129.2, 136.1 (ArC), 156.2 and 156.4 ( $2\times\text{C}=\text{O}$ );  $m/z$  (ES+ve mode), 779 ( $[2\text{M}+\text{Na}]^+$ ) and 401 ( $[\text{M}+\text{Na}]^+$ ).

**Benzyl 3-[(t-butoxycarbonylamino)methyl]-6-(hydroxymethyl)-3,6-dihydro-2H-1,2-oxazine-2-carboxylate 13.** Yield, 42%. Found:  $m/z$ , 401.1684;  $\text{C}_{19}\text{H}_{26}\text{N}_2\text{O}_6\text{Na}$  requires  $m/z$ , 401.1689;  $\nu_{\text{max}}$  (film) 3650-3150, 2976, 2900, 2840, 1695 (vs), 1512, 1450 (w) and  $733\text{ cm}^{-1}$ ;  $\delta_{\text{H}}$  (400 MHz,  $\text{CDCl}_3$ ): 1.50 (9H, s,  $\text{Me}_3\text{C}$ ), 3.25-3.45 (2 H, m,  $\text{CHCH}_2\text{NHBoc}$ ), 3.70-3.90 (2 H, m,  $\text{CH}_2\text{OH}$ ), 4.55 (1 H, m,  $\text{CHCH}_2\text{NHBoc}$ ), 4.65 (1 H, m,  $\text{CHCH}_2\text{OH}$ ), 5.05 (1 H, br, NH), 5.20 (2 H, s,  $\text{OCH}_2\text{Ph}$ ), 5.85-5.90 (2 H, m,  $\text{CH}=\text{CH}$ ) and 7.35 (5 H, m, ArH);  $\delta_{\text{C}}$  (100 MHz): 28.0 ( $\text{Me}_3\text{C}$ ), 42.1 ( $\text{CH}_2\text{NHBoc}$ ), 54.2 ( $\text{CHCH}_2\text{NHBoc}$ ), 62.8 ( $\text{CH}_2\text{OH}$ ), 67.5 ( $\text{CH}_2\text{Ph}$ ), 77.6 ( $\text{CHCH}_2\text{OH}$ ), 79.2 ( $\text{Me}_3\text{C}$ ), 125.4,

126.1 (CH=CH), 127.6, 127.9, 128.2, 135.4 (ArC), 155.0 and 155.6 (2xC=O); m/z 401 (MNa<sup>+</sup>, 100%) and 417 (MK<sup>+</sup>, 23%).

**Crystal structure data for compound 7:** C<sub>14</sub>H<sub>14</sub>N<sub>2</sub>O<sub>3</sub> *M* = 258.27; colourless prism, 0.50 × 0.32 × 0.25 mm<sup>3</sup>; monoclinic, *P*2<sub>1</sub>/*c* (No. 14); *a* = 5.619(1) *b* = 17.695(3) *c* = 12.511(2) Å; β = 102.957(3)°; *V* = 1212.2(4) Å<sup>3</sup>; *Z* = 4; *D*<sub>c</sub> = 1.418 g/cm<sup>3</sup>; *T* = 150(2)K. 6404 reflections collected, 2183 unique. *R*<sub>int</sub> = 0.0316, final *Goof* = 1.094. *RI* = 0.0490, *R2* = 0.1015; 228 parameters, 0 restraints, μ = 0.101 mm<sup>-1</sup>

**Crystal structure data for compound 10e:** C<sub>18</sub>H<sub>22</sub>N<sub>2</sub>O<sub>7</sub>, *M* = 378.38, colourless plate, 0.50 × 0.40 × 0.15 mm<sup>3</sup>, triclinic, space group *P*-1 (No. 2), *a* = 5.8725(14), *b* = 10.826(3), *c* = 14.459(3) Å, α = 74.694(4), β = 88.672(4), γ = 85.198(4)°, *V* = 883.5(4) Å<sup>3</sup>, *Z* = 2, *D*<sub>c</sub> = 1.422 g/cm<sup>3</sup>, *F*<sub>000</sub> = 400, Bruker D8 diffractometer with APEX detector, MoKα radiation, λ = 0.71073 Å, *T* = 100(2)K, 2θ<sub>max</sub> = 54.2°, 5215 reflections collected, 3709 unique (*R*<sub>int</sub> = 0.0156). Final *Goof* = 1.096, *RI* = 0.0386, *wR2* = 0.1029, *R* indices based on 3168 reflections with *I* > 2σ(*I*) (refinement on *F*<sup>2</sup>), 248 parameters, 0 restraints, μ = 0.110 mm<sup>-1</sup>.

#### Proton 2D NMR data for compound 10e

A high resolution <sup>1</sup>H COSY spectrum with a 30° read pulse was recorded at 300 MHz and room temperature for **10e**. 2048 t<sub>1</sub> increments of 4096 complex points were recorded in a total time of 11 h and processed with one zero-filling in F<sub>1</sub> and a weighting function combining sinebell weighting with a rising exponential of time constant 2/π s in both dimensions, with the results shown below.

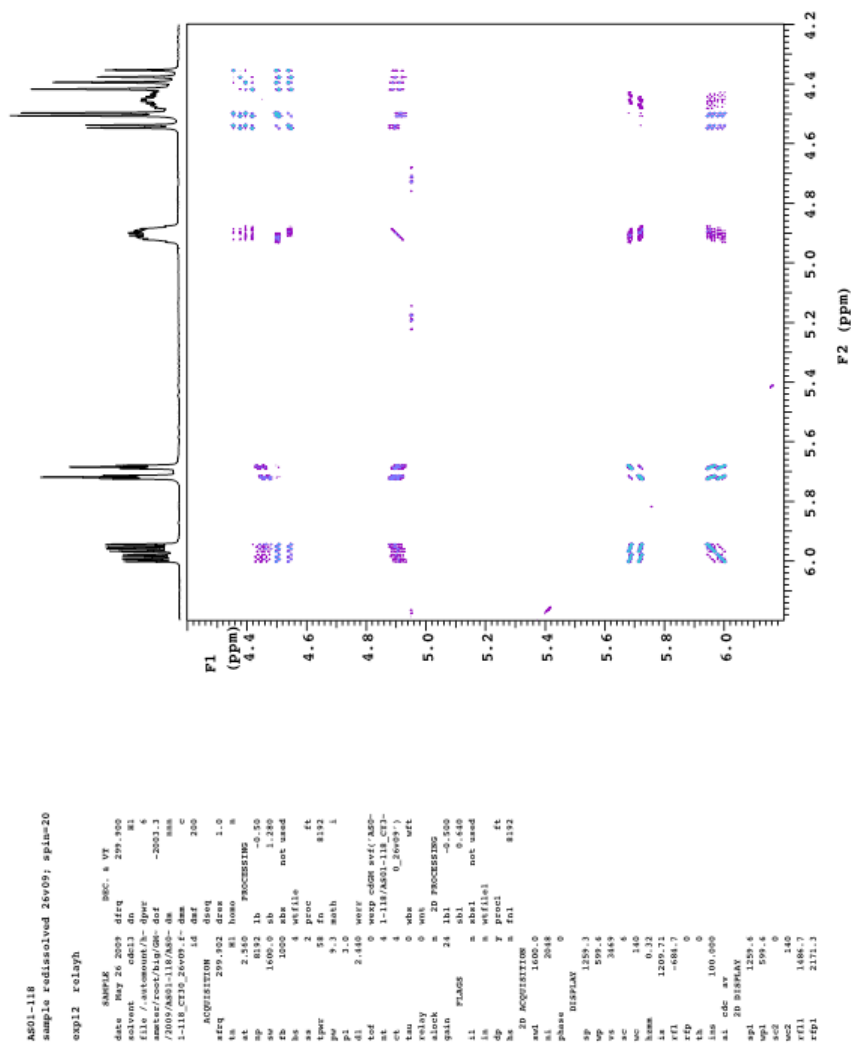

**Coupling constants** (Hz) in the table below were determined from resolution-enhanced 1D 500 MHz  $^1\text{H}$  spectra measured with and without homonuclear coupling, and signs of coupling constants were deduced by inspection of the layout of passive coupling structure in the low flip angle COSY spectrum assuming the 10.5 Hz vicinal coupling between H4 and H5 to be positive.

| <b>Proton</b> | <b>3</b> | <b>4</b> | <b>5</b> | <b>6</b> |
|---------------|----------|----------|----------|----------|
| <b>3</b>      | -        | +4.6     | -1.8     | +2.6     |
| <b>4</b>      | +4.6     | -        | +10.5    | -2.3     |
| <b>5</b>      | -1.8     | +10.5    | -        | +1.5     |
| <b>6</b>      | +2.6     | -2.3     | +1.5     | -        |

### **Additional References**

29. B. Narasimhan, V. Judge, R. Narang, R. Ohlan and S. Ohlan, *Bioorg. Med. Chem. Lett.*, 2007, **17**, 5836-5845.
30. P. Vinczer, M. Aesa, S. Sztruhar, V. Barbier and L. Novak, *Magyar Kemiai Folyoirat*, 1993, **99**, 443 (*Chem. Abs.*, 1994, **120**, 269737).
31. A. Defoin, M. Joubert, J. -M. Heuchel, C. Strehler and J. Streith, *Synthesis*, 2000, 1719-1726.
